# Supplementary figures and images for: A cerebellar substrate for cognition evolved multiple times independently in mammals
Source: eLife journal article supplement (doi:10.7554/elife.35696), 2018-05-29

Lateral v medial cerebellum size

$pp$  threshold = 0.8

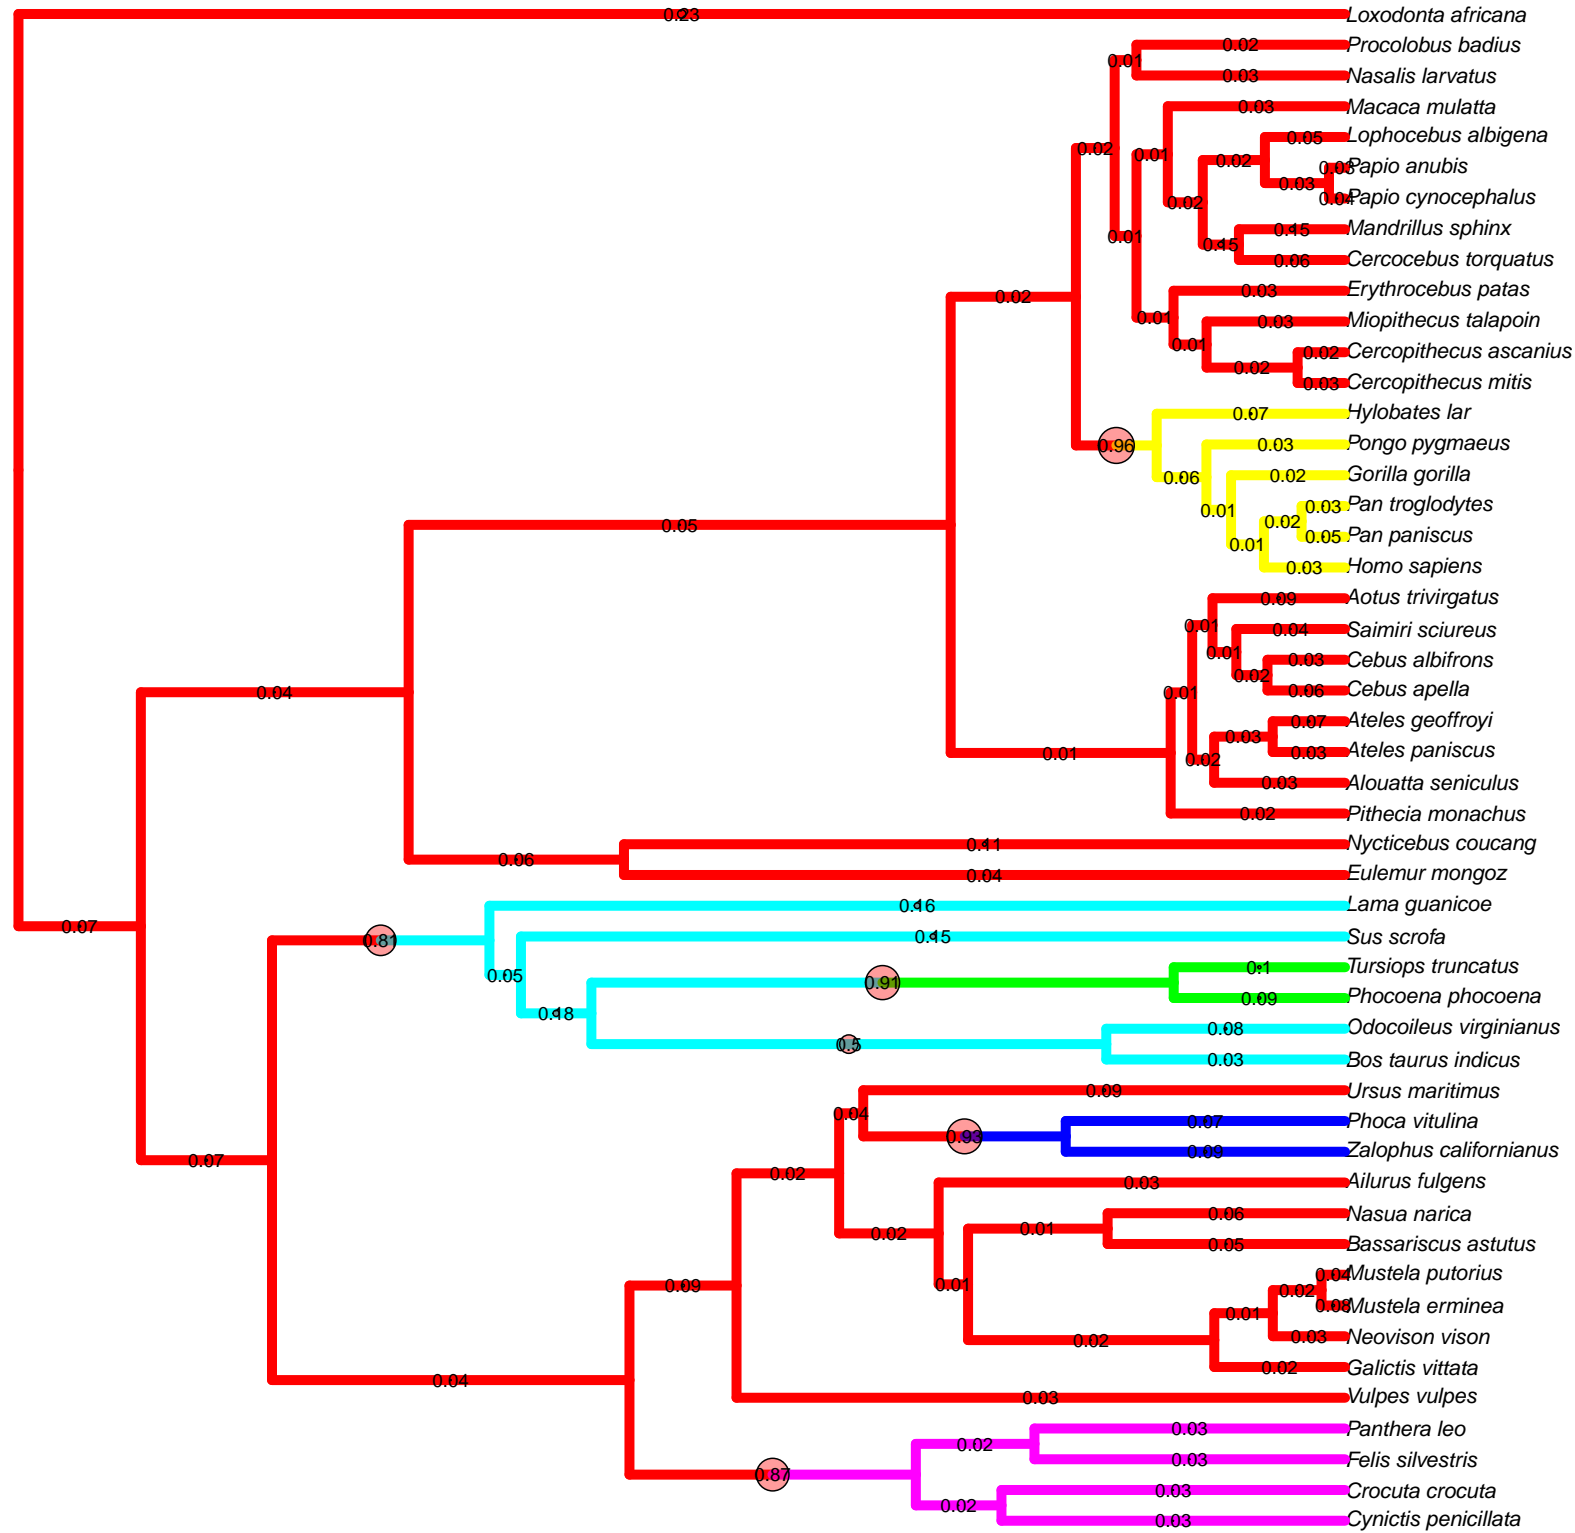

Relative cerebellum size

$pp$  threshold = 0.2

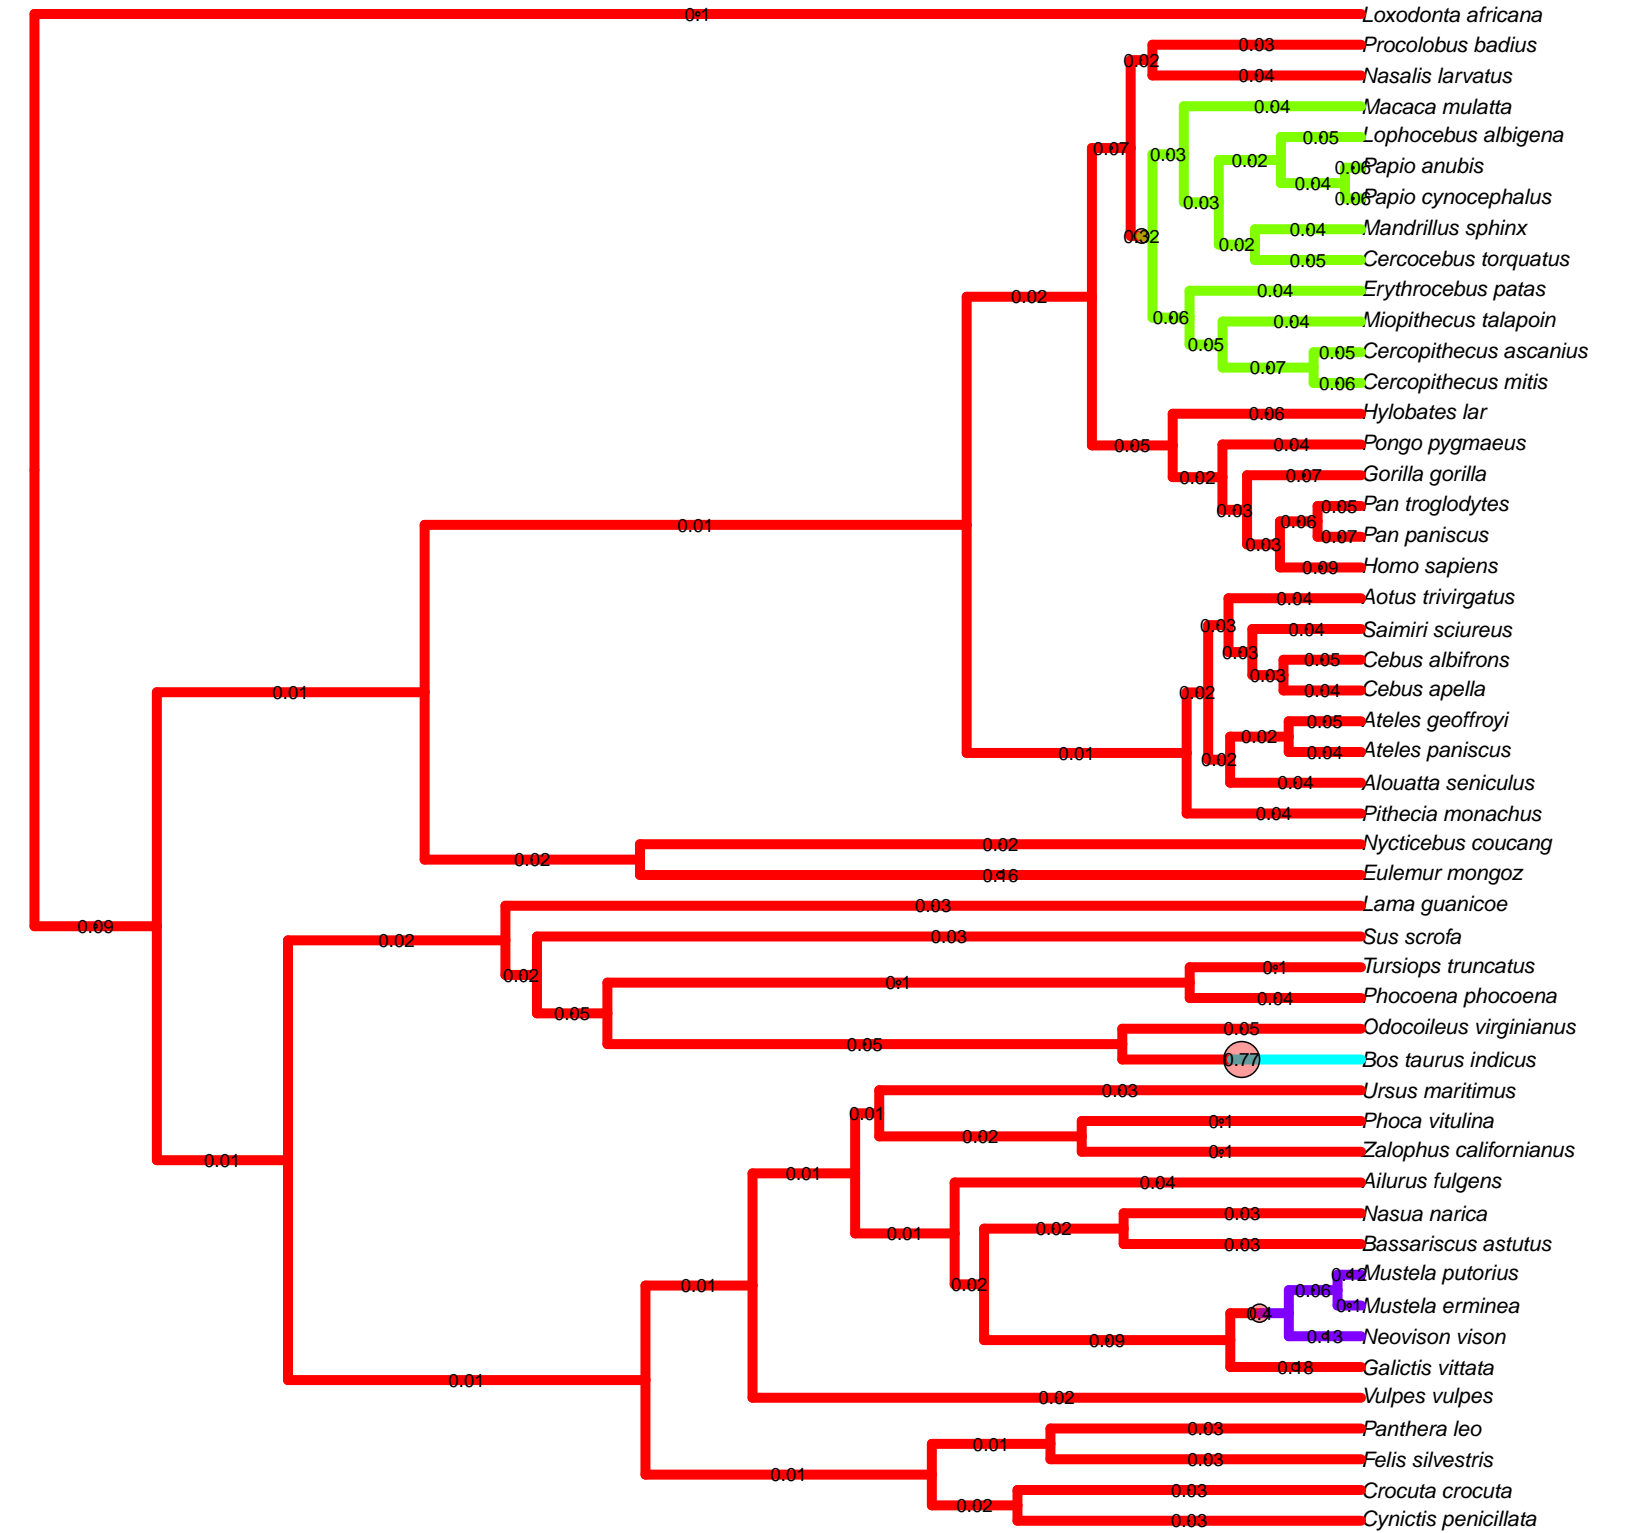

Supplement: supp [file elife-35696-supp-v1.zip]

mvBM

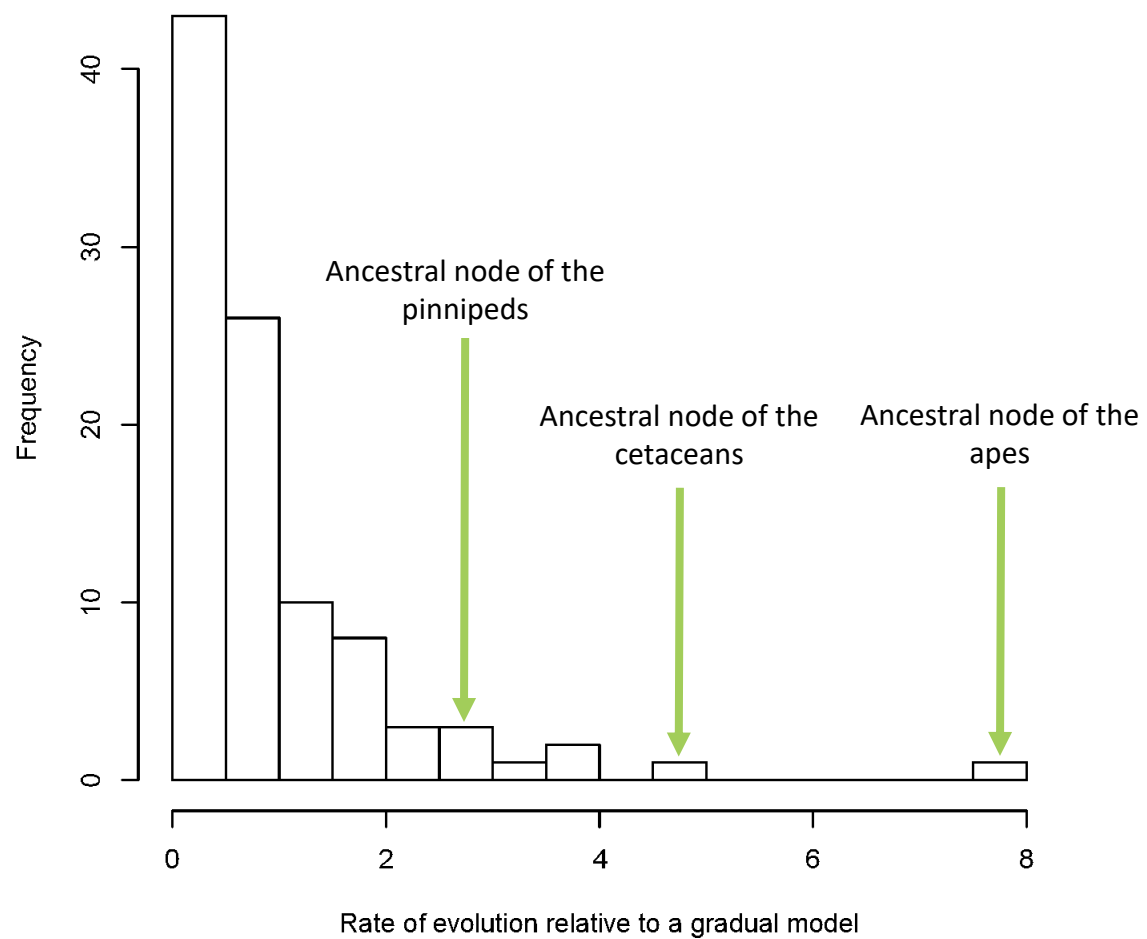

rjBM

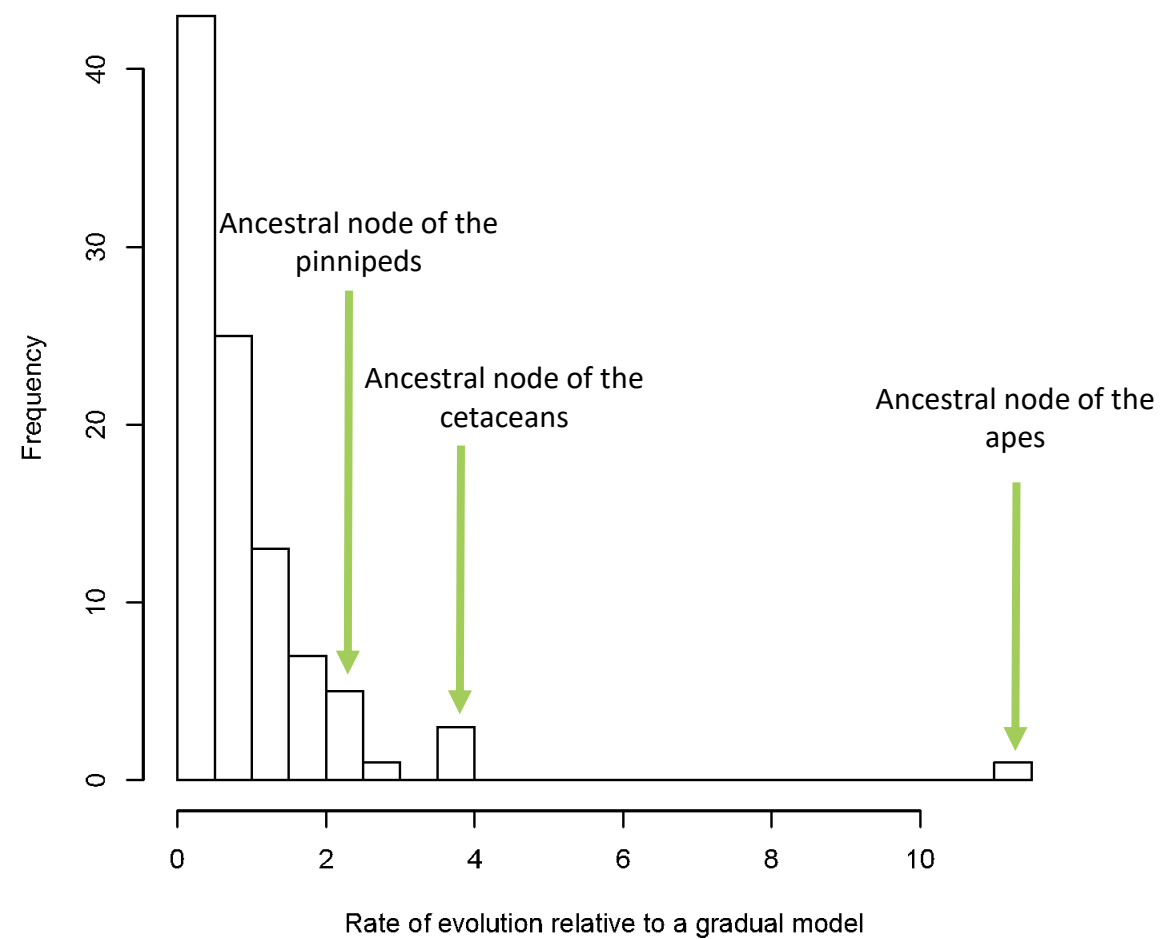

Supplement: supp [file elife-35696-supp-v1.zip]

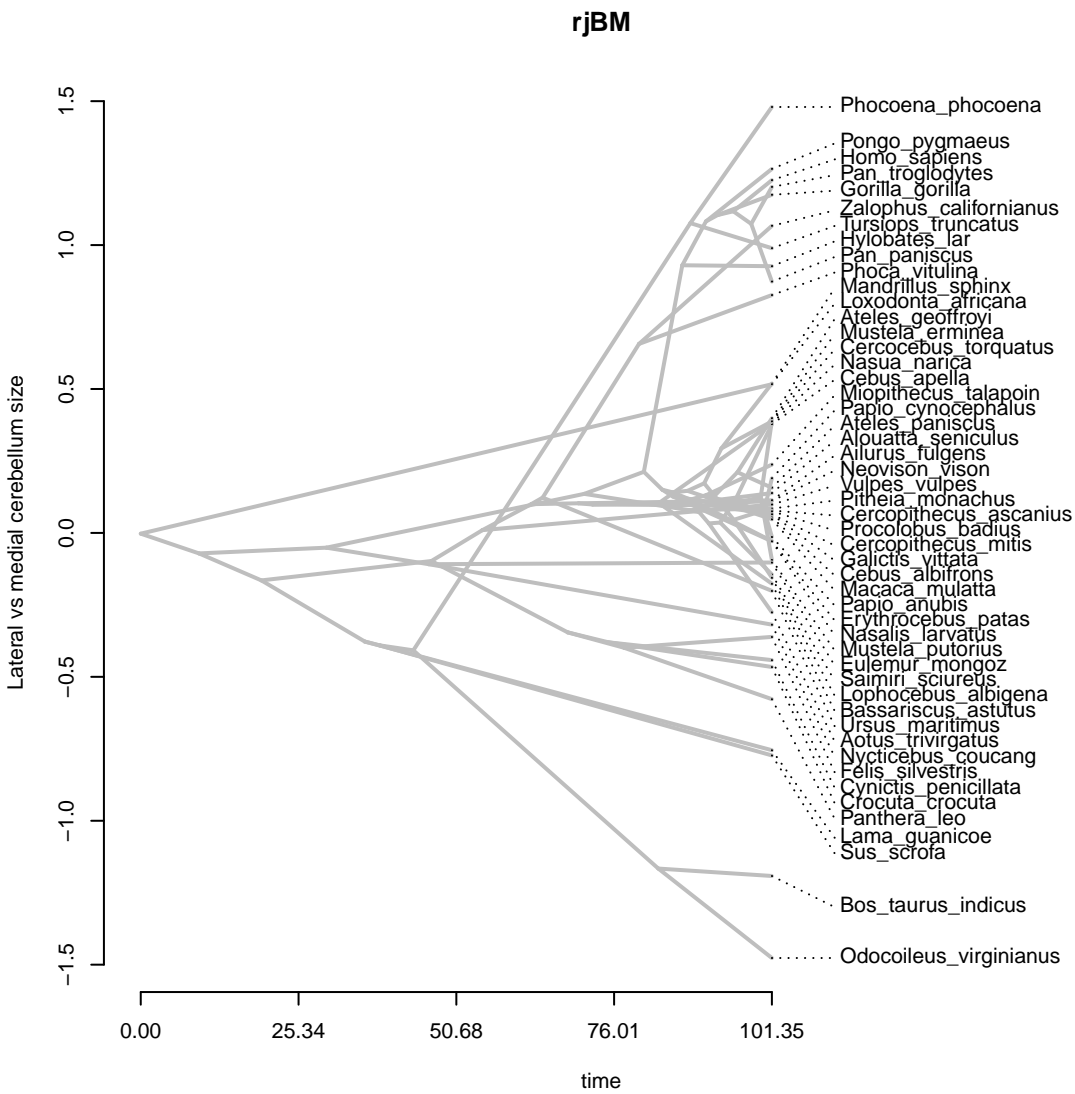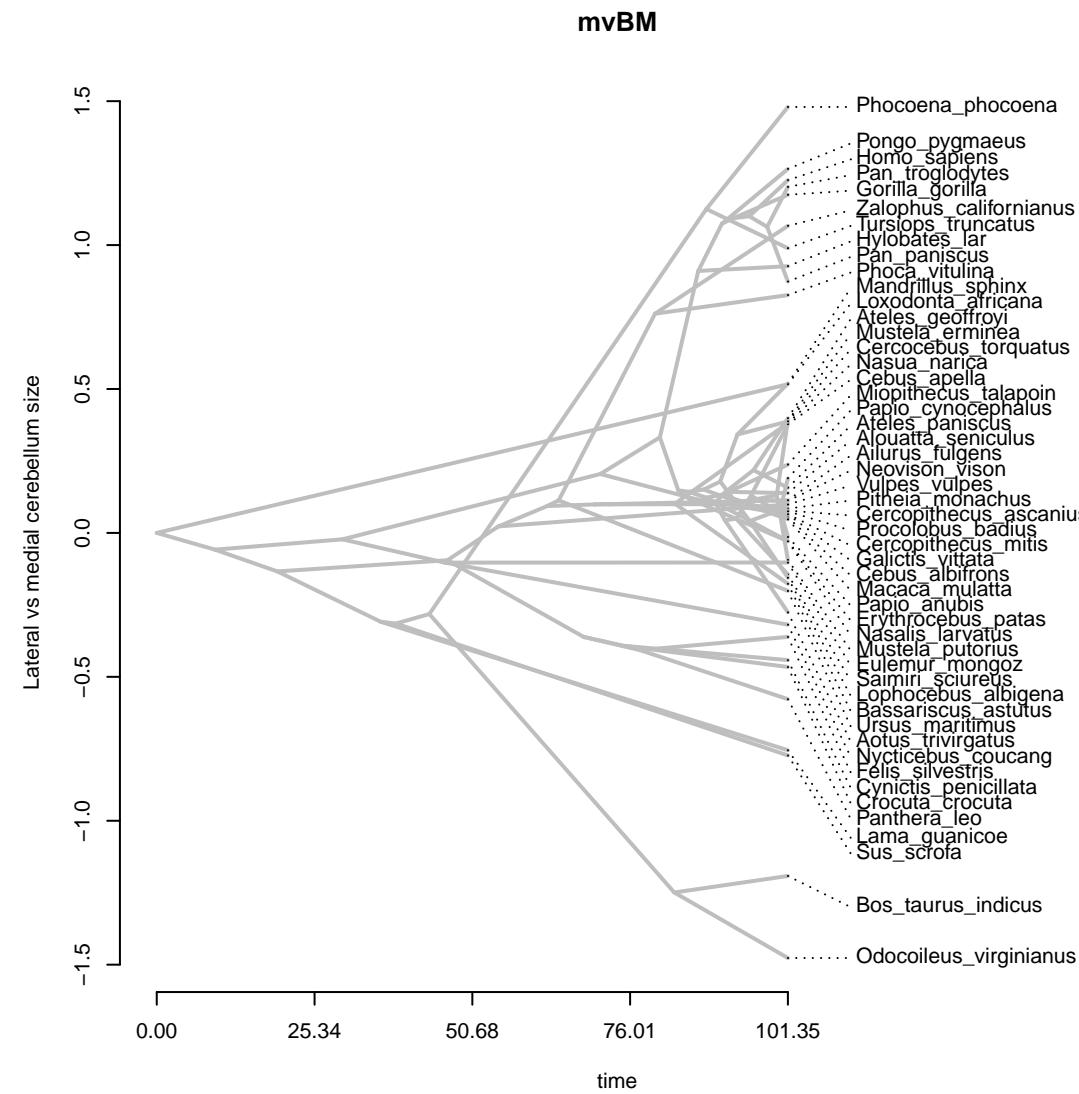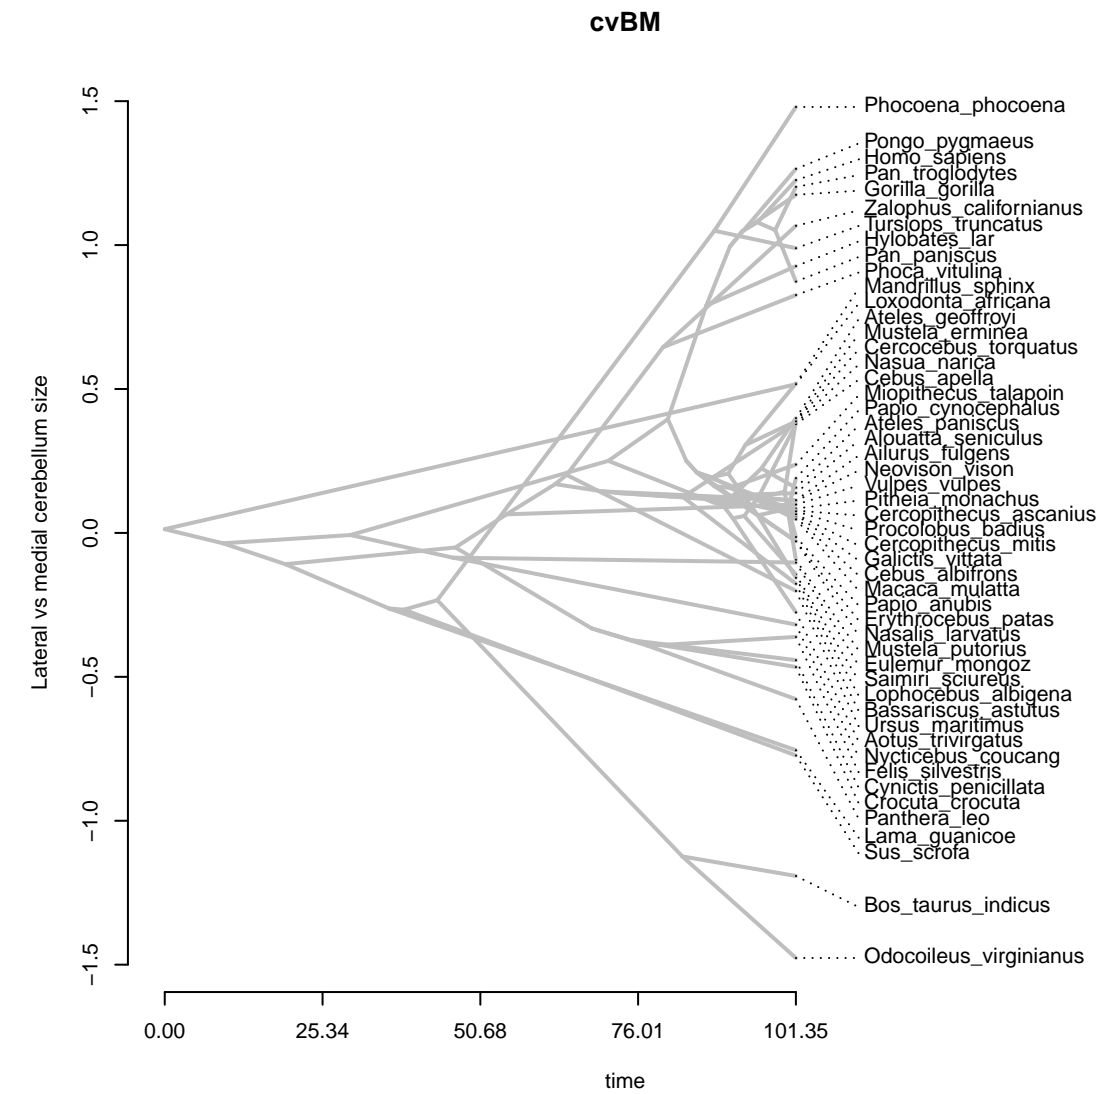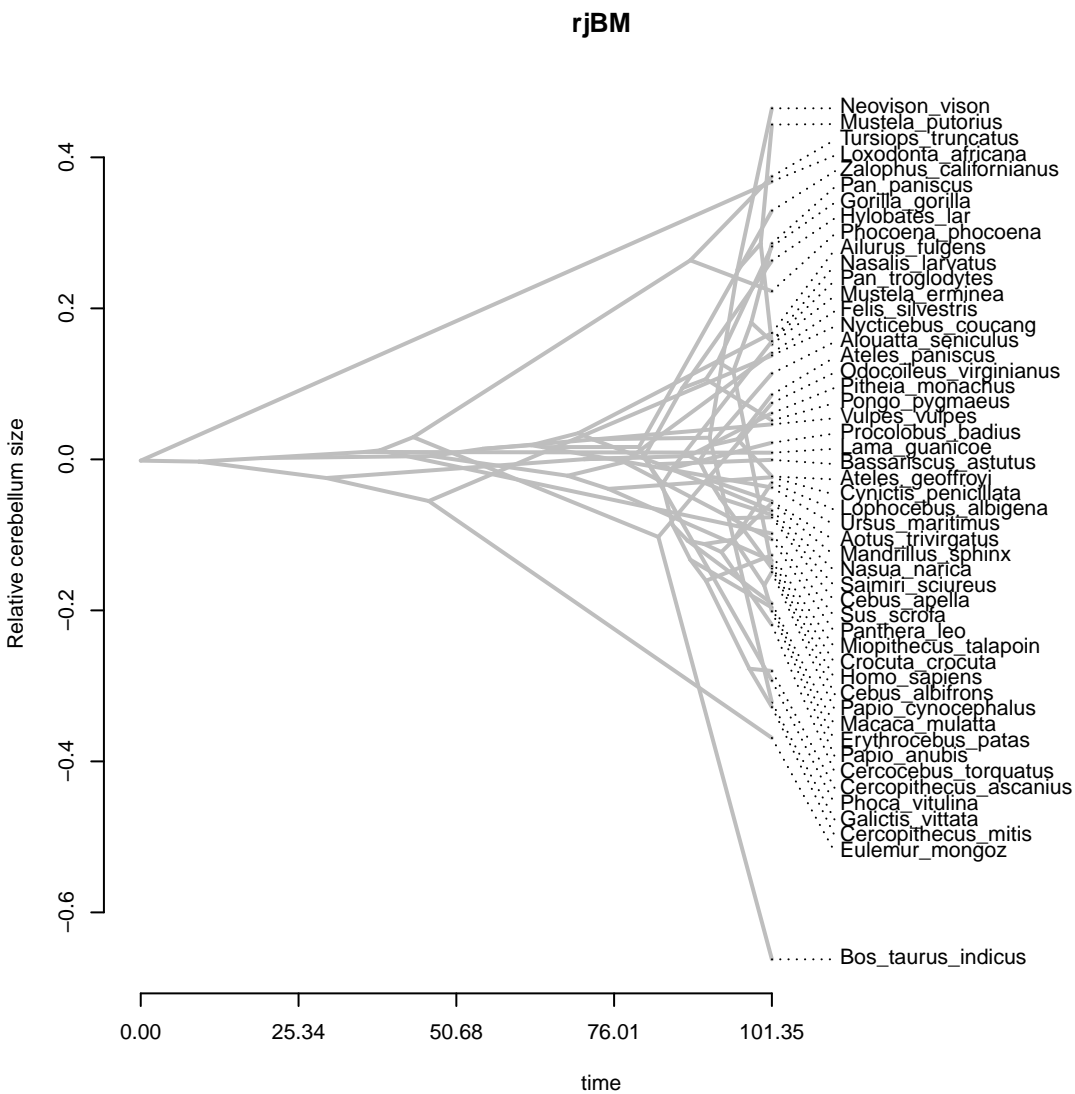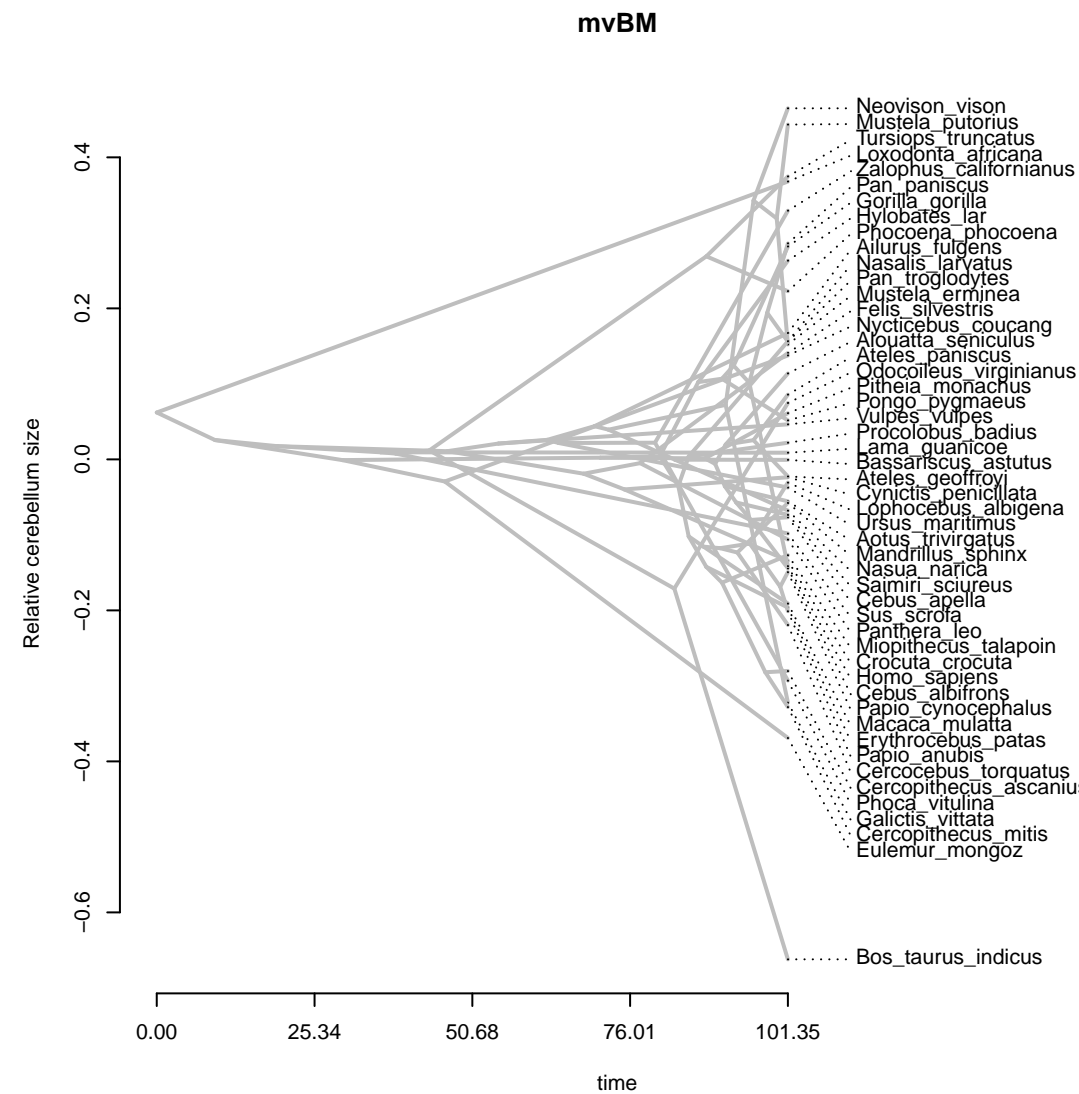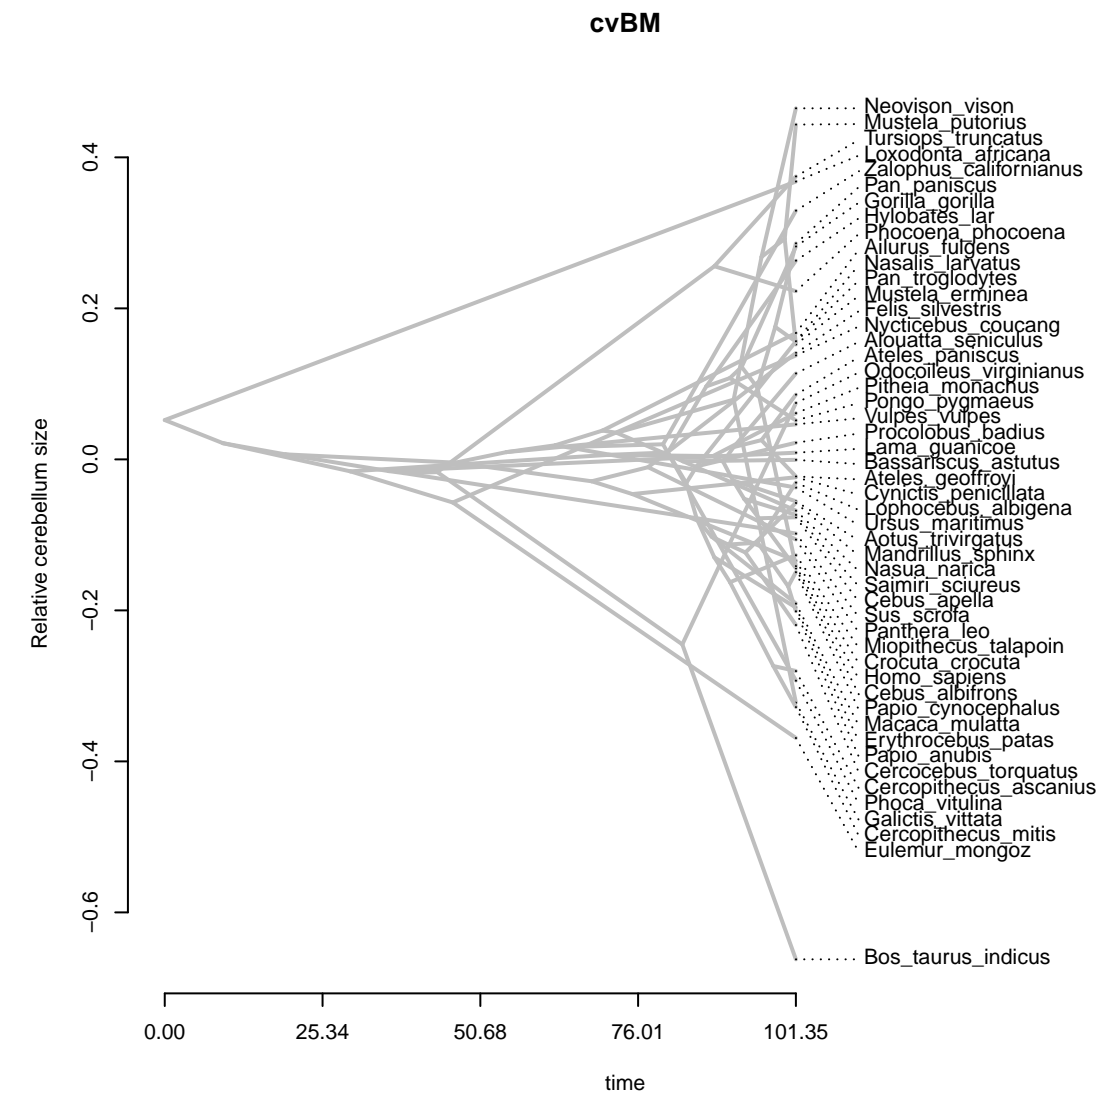

Supplement: supp [file elife-35696-supp-v1.zip]
